# Supplementary material for: A Retrospective Observational Real-Word Analysis of the Adherence, Healthcare Resource Consumption and Costs in Patients Treated with Bisoprolol/Perindopril as Single-Pill or Free Combination
Source: Springer Nature journal article supplement (doi:10.1007/s12325-023-02707-7), 2023-10-21

**A real-word analysis of the adherence, outcomes and healthcare costs in patients treated with perindopril/bisoprolol as single-pill or free combination**

**Short title:** The Single Pill Combination perindopril/bisoprolol in clinical practice

Stefano Masi<sup>1</sup>, Zhanna Kobalava<sup>2</sup>, Chiara Veronesi<sup>3</sup>, Elisa Giacomini<sup>3</sup>, Luca Degli Esposti<sup>3</sup>, Konstantinos Tsioufis<sup>4</sup>

1. Department of Clinical and Experimental Medicine, University of Pisa, Italy
2. Department of Internal Medicine and Cardiology, RUDN University, Moscow, RUSSIA
3. CliCon S.r.l. Società Benefit, Health, Economics & Outcomes Research, Bologna, Italy
4. 1<sup>st</sup> Department of Cardiology, National and Kapodistrian university of Athens, Hippocratio Hospital, Greece

**Corresponding author:**

Prof Stefano Masi

Department of Clinical and Experimental Medicine

University of Pisa, Italy

Via Roma, 67

56126 Pisa

Email: stefano.masi@unipi.it

## SUPPLEMENTARY TABLES

**Supplementary table 1.** List of ICD-9-CM codes used to define diseases.

| COMORBIDITY                                   | IDENTIFICATION CODES                                                                   |
|-----------------------------------------------|----------------------------------------------------------------------------------------|
| HYPERTENSIVE DISEASE                          | ICD-9-CM codes 401-405                                                                 |
| ISCHEMIC HEART DISEASES                       | ICD-9-CM codes 410-414                                                                 |
| HEART FAILURE                                 | ICD-9-CM code 428                                                                      |
| CEREBROVASCULAR DISEASES                      | ICD-9-CM codes 430-438                                                                 |
| PERIPHERAL VASCULAR DISEASES                  | ICD-9-CM codes 440-442                                                                 |
| DIABETES                                      | ICD-9-CM code 250 or at least two prescriptions of anti-diabetic drugs (ATC code: A10) |
| CKD DISEASE:                                  | ICD-9-CM codes 585.3-5                                                                 |
| CHRONIC OBSTRUCTIVE PULMONARY DISEASE (COPD): | Identified by at least two prescriptions for ATC R03.                                  |
| PSYCHIATRIC DISEASE:                          | ICD-9-CM codes 290-319                                                                 |

**Supplementary table 2.** List of ATC codes used to define the presence of concomitant prescriptions.

| CO-TREATMENTS                                        | ATC CODES                                                                                           |
|------------------------------------------------------|-----------------------------------------------------------------------------------------------------|
| LIPID-LOWERING AGENTS:                               | at least two prescriptions for ATC C10 (statins were identified as ATC code C10AA)                  |
| ANTI HYPERTENSIVE TREATMENTS (EXCLUDED STUDY DRUGS): | at least two prescriptions for ATC C02, C03, C07, C08, C09, excluded ATC C09AA04, C07AB07, C09BX02. |
| ANTITHROMBOTIC AGENTS                                | at least two prescriptions for ATC B01AA, B01AE                                                     |
| ANTIARRHYTHMICS                                      | at least two prescriptions for ATC C01B                                                             |
| ANTIINFLAMMATORY DRUGS:                              | identified by identified by at least two prescriptions for ATC M01;                                 |
| ANTIDEPRESSANTS:                                     | at least two prescriptions for ATC N06A.                                                            |

**Supplementary table 3.** Clinical characteristics of the patients included in the study, stratified by SPC or FEC use before PSM.

|                                    | <b>Cohort FEC<br/>(N= 6,521)</b> | <b>Cohort SPC<br/>(N=11,440)</b> | <b>P-value</b> |
|------------------------------------|----------------------------------|----------------------------------|----------------|
| Age, mean (SD)                     | 6,521                            | 11,440                           | <0.001         |
| Male, N (%)                        | 72.9 (11.8)                      | 63.3 (12.9)                      | <0.001         |
| COPD, N (%)                        | 3403 (52.2)                      | 5131 (44.9)                      | 0.500          |
| Diabetes, N (%)                    | 1975 (30.3)                      | 3520 (30.8)                      | <0.001         |
| Primary prevention, N (%)          | 1602 (24.6)                      | 2146 (18.8)                      | <0.001         |
| Secondary prevention, N (%)        | 4658 (71.4)                      | 9721 (85.0)                      |                |
| Ischemic heart disease, N (%)      | 1863 (28.6)                      | 1719 (15.0)                      | <0.001         |
| Heart failure, N (%)               | 1153 (17.7)                      | 1157 (10.1)                      | <0.001         |
| Cerebrovascular disease, N (%)     | 441 (6.8)                        | 352 (3.1)                        | <0.001         |
| Peripheral vascular disease, N (%) | 677 (10.4)                       | 517 (4.5)                        | <0.001         |
| CKD disease, N (%)                 | 230 (3.5)                        | 228 (2.0)                        | <0.001         |
| Psychiatric disease, N (%)         | 103 (1.6)                        | 83 (0.7)                         | <0.001         |

**Supplementary table 4.** Drug prescription of the patients included in the study, stratified by SPC or FEC use before PSM.

| <b>Previous treatment</b>                | <b>Cohort FEC<br/>(N= 6,521)</b> | <b>Cohort SPC<br/>(N=11,440)</b> | <b>P-value</b> |
|------------------------------------------|----------------------------------|----------------------------------|----------------|
| Other antihypertensive treatment, N (%)  | 4889 (75.0)                      | 9051 (79.1)                      | <0.001         |
| Lipid-lowering treatment, N (%)          | 3717 (57.0)                      | 4484 (39.2)                      | <0.001         |
| <i>Statins</i> , N (%)                   | 3416 (52.4)                      | 4100 (35.8)                      | <0.001         |
| ACE inhibitors*, N (%)                   | 2469 (37.9)                      | 5081 (44.4)                      | <0.001         |
| Angiotensin II Receptor Blockers , N (%) | 1307 (20.0)                      | 3641 (31.8)                      | <0.001         |
| Beta Blocking Agents, N (%)              | 1265 (19.4)                      | 4256 (37.2)                      | <0.001         |
| Calcium Channel Blockers, N (%)          | 2061 (31.6)                      | 2564 (22.4)                      | <0.001         |
| Diuretics**, N (%)                       | 2143 (32.9)                      | 1959 (17.1)                      | <0.001         |
| Antithrombotic Agents, N (%)             | 805 (12.3)                       | 515 (4.5)                        | <0.001         |
| Antiarrhythmics, N (%)                   | 654 (10.0)                       | 560 (4.9)                        | <0.001         |
| Digoxin, N (%)                           | 340 (5.2)                        | 191 (1.7)                        | <0.001         |
| Ivradabina, N (%)                        | 134 (2.1)                        | 200 (1.7)                        | 0.143          |
| Antiinflammatory treatment, N (%)        | 3641 (55.8)                      | 6927 (60.6)                      | <0.001         |
| Antidepressants, N (%)                   | 1194 (18.3)                      | 1853 (16.2)                      | <0.001         |

Note. \* excluded those used for inclusion. \*\*Diuretics analyzed comprised: thiazides, high-ceiling diuretics, spironolactone.

**SUPPLEMENTARY FIGURES**

**Supplementary Figure 1.**

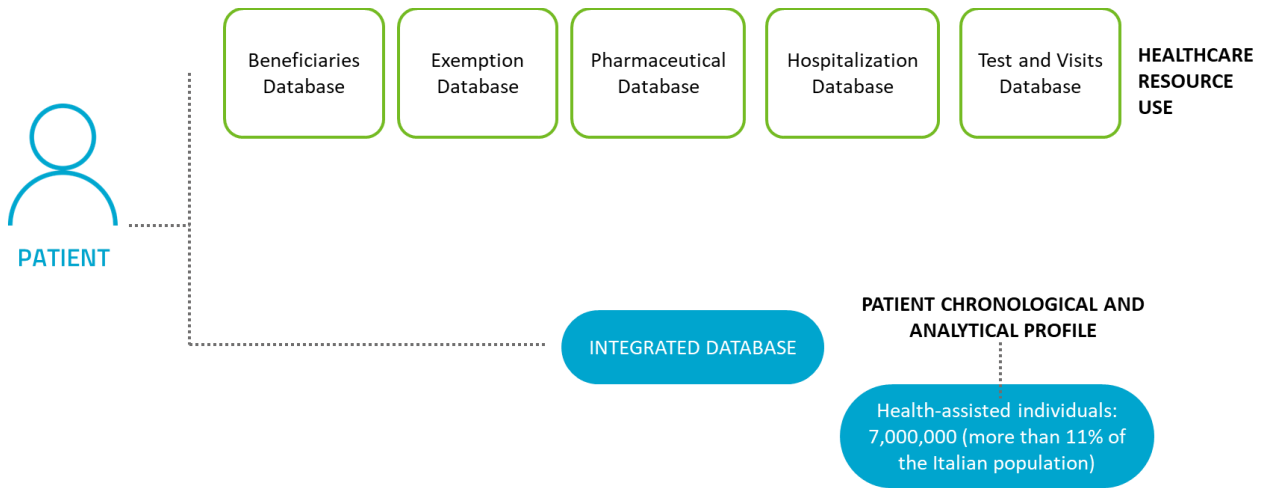

**Supplementary Figure 2.** Disease burden in the subjects taking SPC or FEC included in the study those in the FEC group.

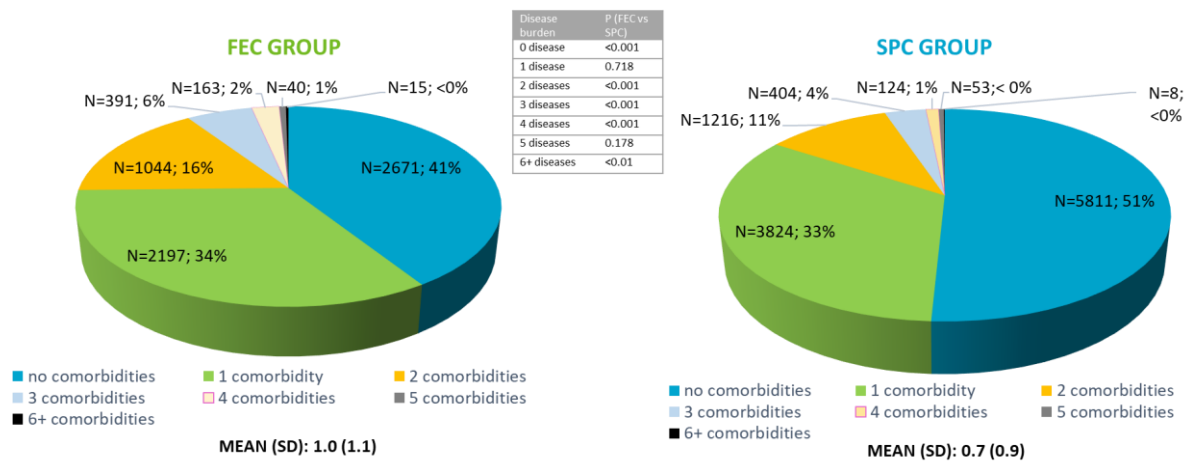

**Supplementary Figure 3.** Pill burden in the subjects taking SPC or FEC included in the study those in the FEC group.

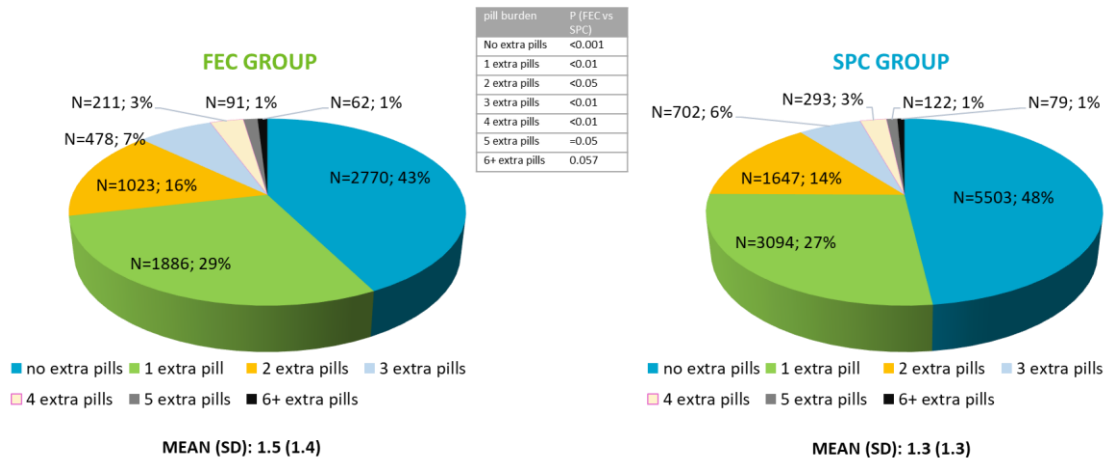

Supplement: MOESM1 [file 26209958]
